# Supplementary material for: Air activation by a metal-free photocatalyst for “totally-green” hydrocarbon selective oxidation
Source: Royal Society of Chemistry journal article supplement (doi:10.1039/c6cy01066k), 2016-01-01
Supplement: c6cy01066k1.pdf [file c6cy01066k1.pdf]

## Electronic Supplementary Information

# Air Activation by Metal-free Photocatalyst for “Total-green” Hydrocarbon Selective Oxidation

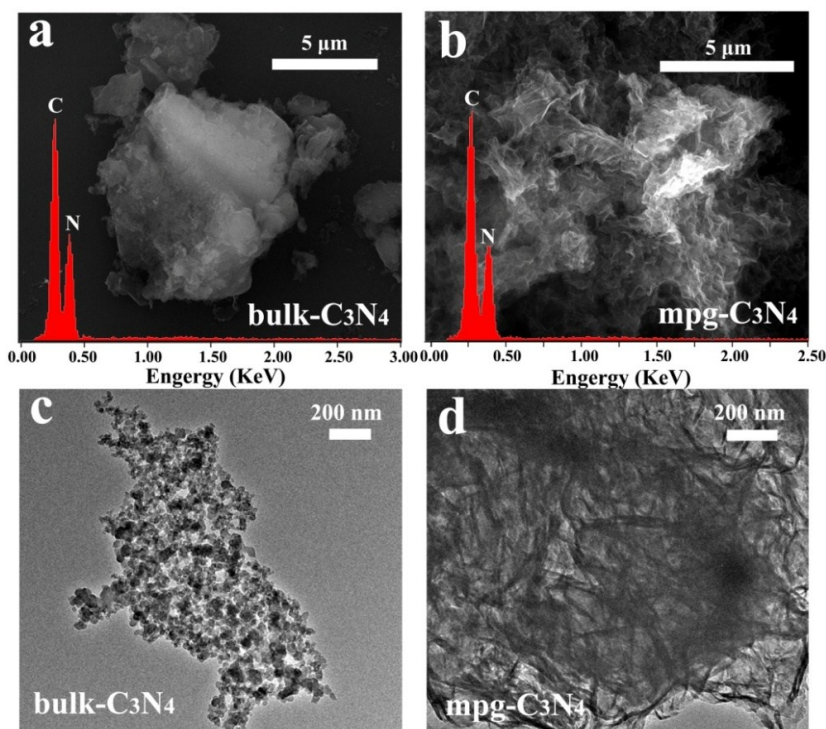

**Fig. S1** (a and b) SEM images and EDS spectra (shown as the red curve overlay at the bottom portion of the panel) of bulk-C<sub>3</sub>N<sub>4</sub> and mpg-C<sub>3</sub>N<sub>4</sub>, respectively. (c and d) TEM images of bulk-C<sub>3</sub>N<sub>4</sub> and mpg-C<sub>3</sub>N<sub>4</sub>, respectively.

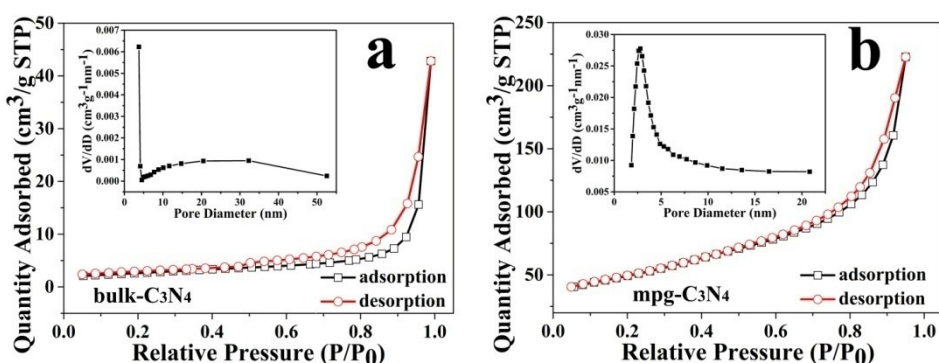

**Fig. S2** (a) Nitrogen adsorption-desorption isotherms of bulk-C<sub>3</sub>N<sub>4</sub>. The inset pattern is the corresponding pore size distribution. (b) Nitrogen adsorption-desorption isotherm of mpg-C<sub>3</sub>N<sub>4</sub>. The inset pattern is the corresponding pore size distribution.

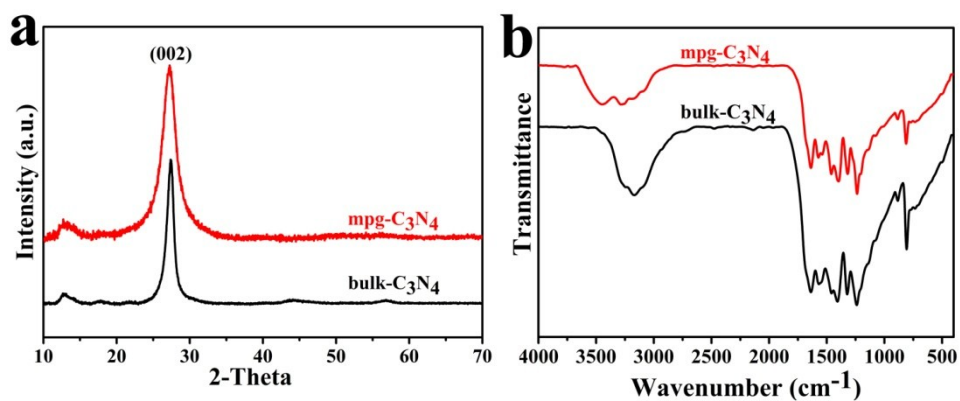

Fig. S3 (a) XRD patterns; (b) FT-IR spectra of bulk-C<sub>3</sub>N<sub>4</sub> and mpg-C<sub>3</sub>N<sub>4</sub> (the black trace represents bulk-C<sub>3</sub>N<sub>4</sub> and the red trace represents mpg-C<sub>3</sub>N<sub>4</sub>).

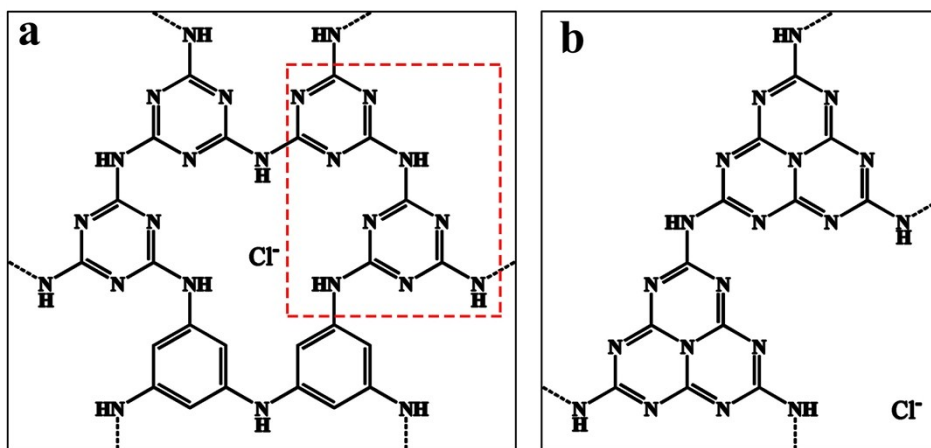

Fig. S4 The possible two kinds of structure of PTI: (a) triazine structure; (b) heptazine structure. The content in the dashed red border (a) is exhibited in Fig. 2(d).

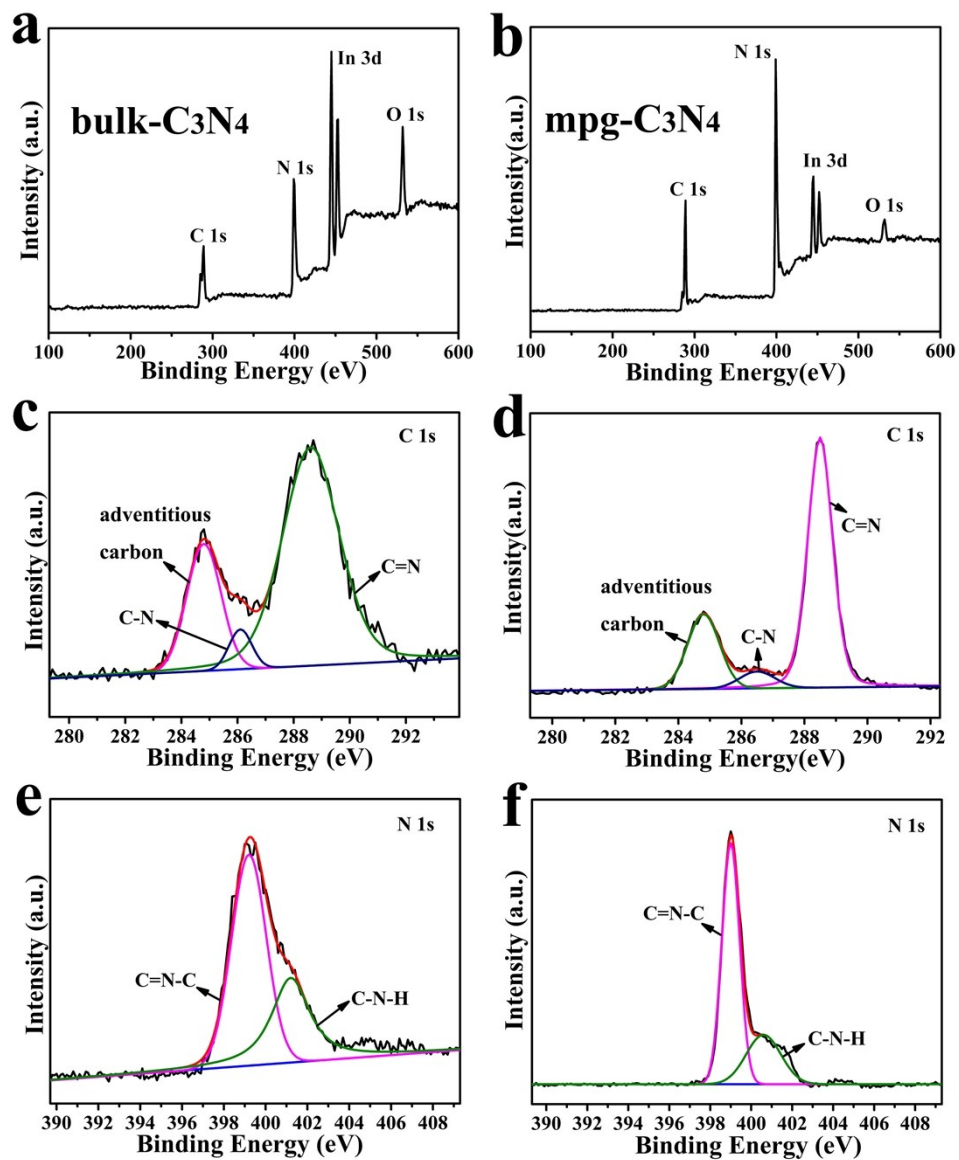

Fig. S5 (a, c and e) XPS full spectra, high-resolution C 1s and N 1s XPS spectra of bulk-C<sub>3</sub>N<sub>4</sub>. (b, d and f) XPS full spectra, high-resolution C 1s and N 1s XPS spectra of mpg-C<sub>3</sub>N<sub>4</sub>.

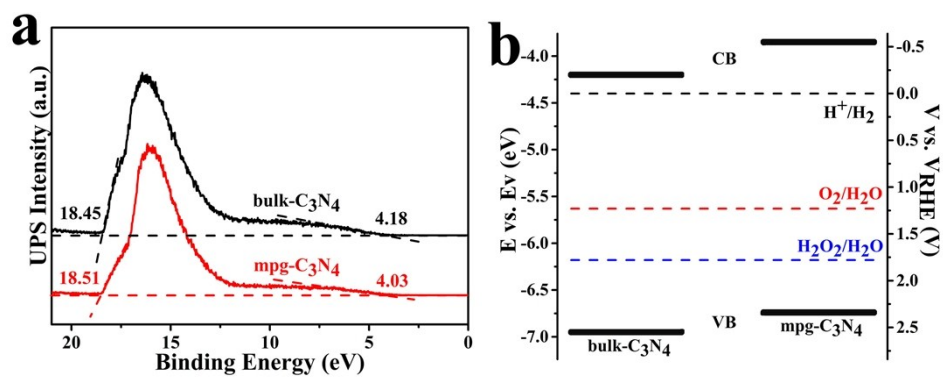

Fig. S6 (a) UPS spectra; (d) Band structure diagram of bulk-C<sub>3</sub>N<sub>4</sub> and mpg-C<sub>3</sub>N<sub>4</sub>, respectively.

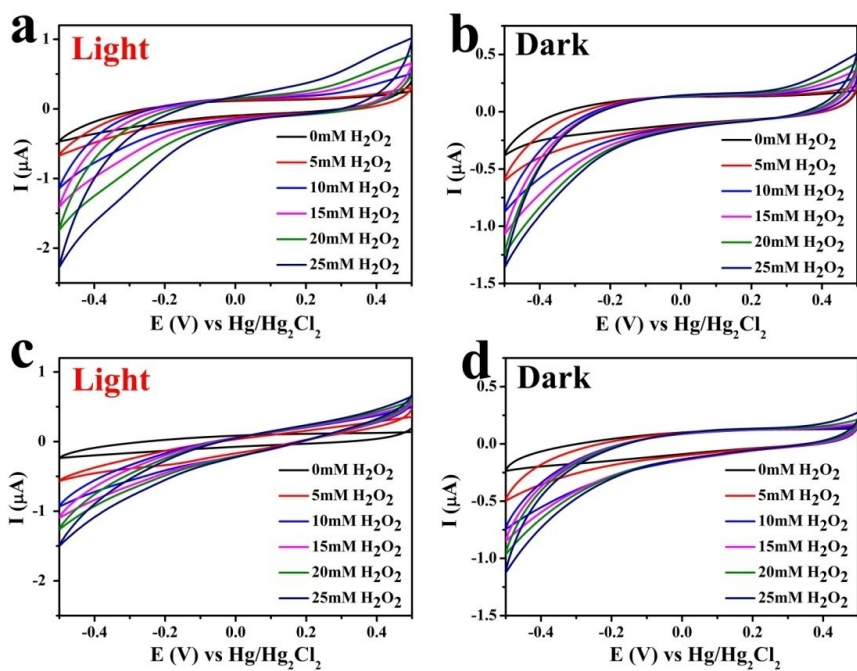

**Fig. S7** (a and b) Cyclic voltammograms of bulk- $C_3N_4$ -modified GC electrode under light illumination and dark condition, respectively. (c and d) Cyclic voltammograms of mpg- $C_3N_4$ -modified GC electrode with light and dark, respectively.
